# Supplementary material
Source: Springer Nature journal article supplement (https://www.springermedizin.de/resource/supplementary/12913_2010_1710_MOESM1_ESM.pdf/9528810)

Differences in Kappa values 2003 - 1999

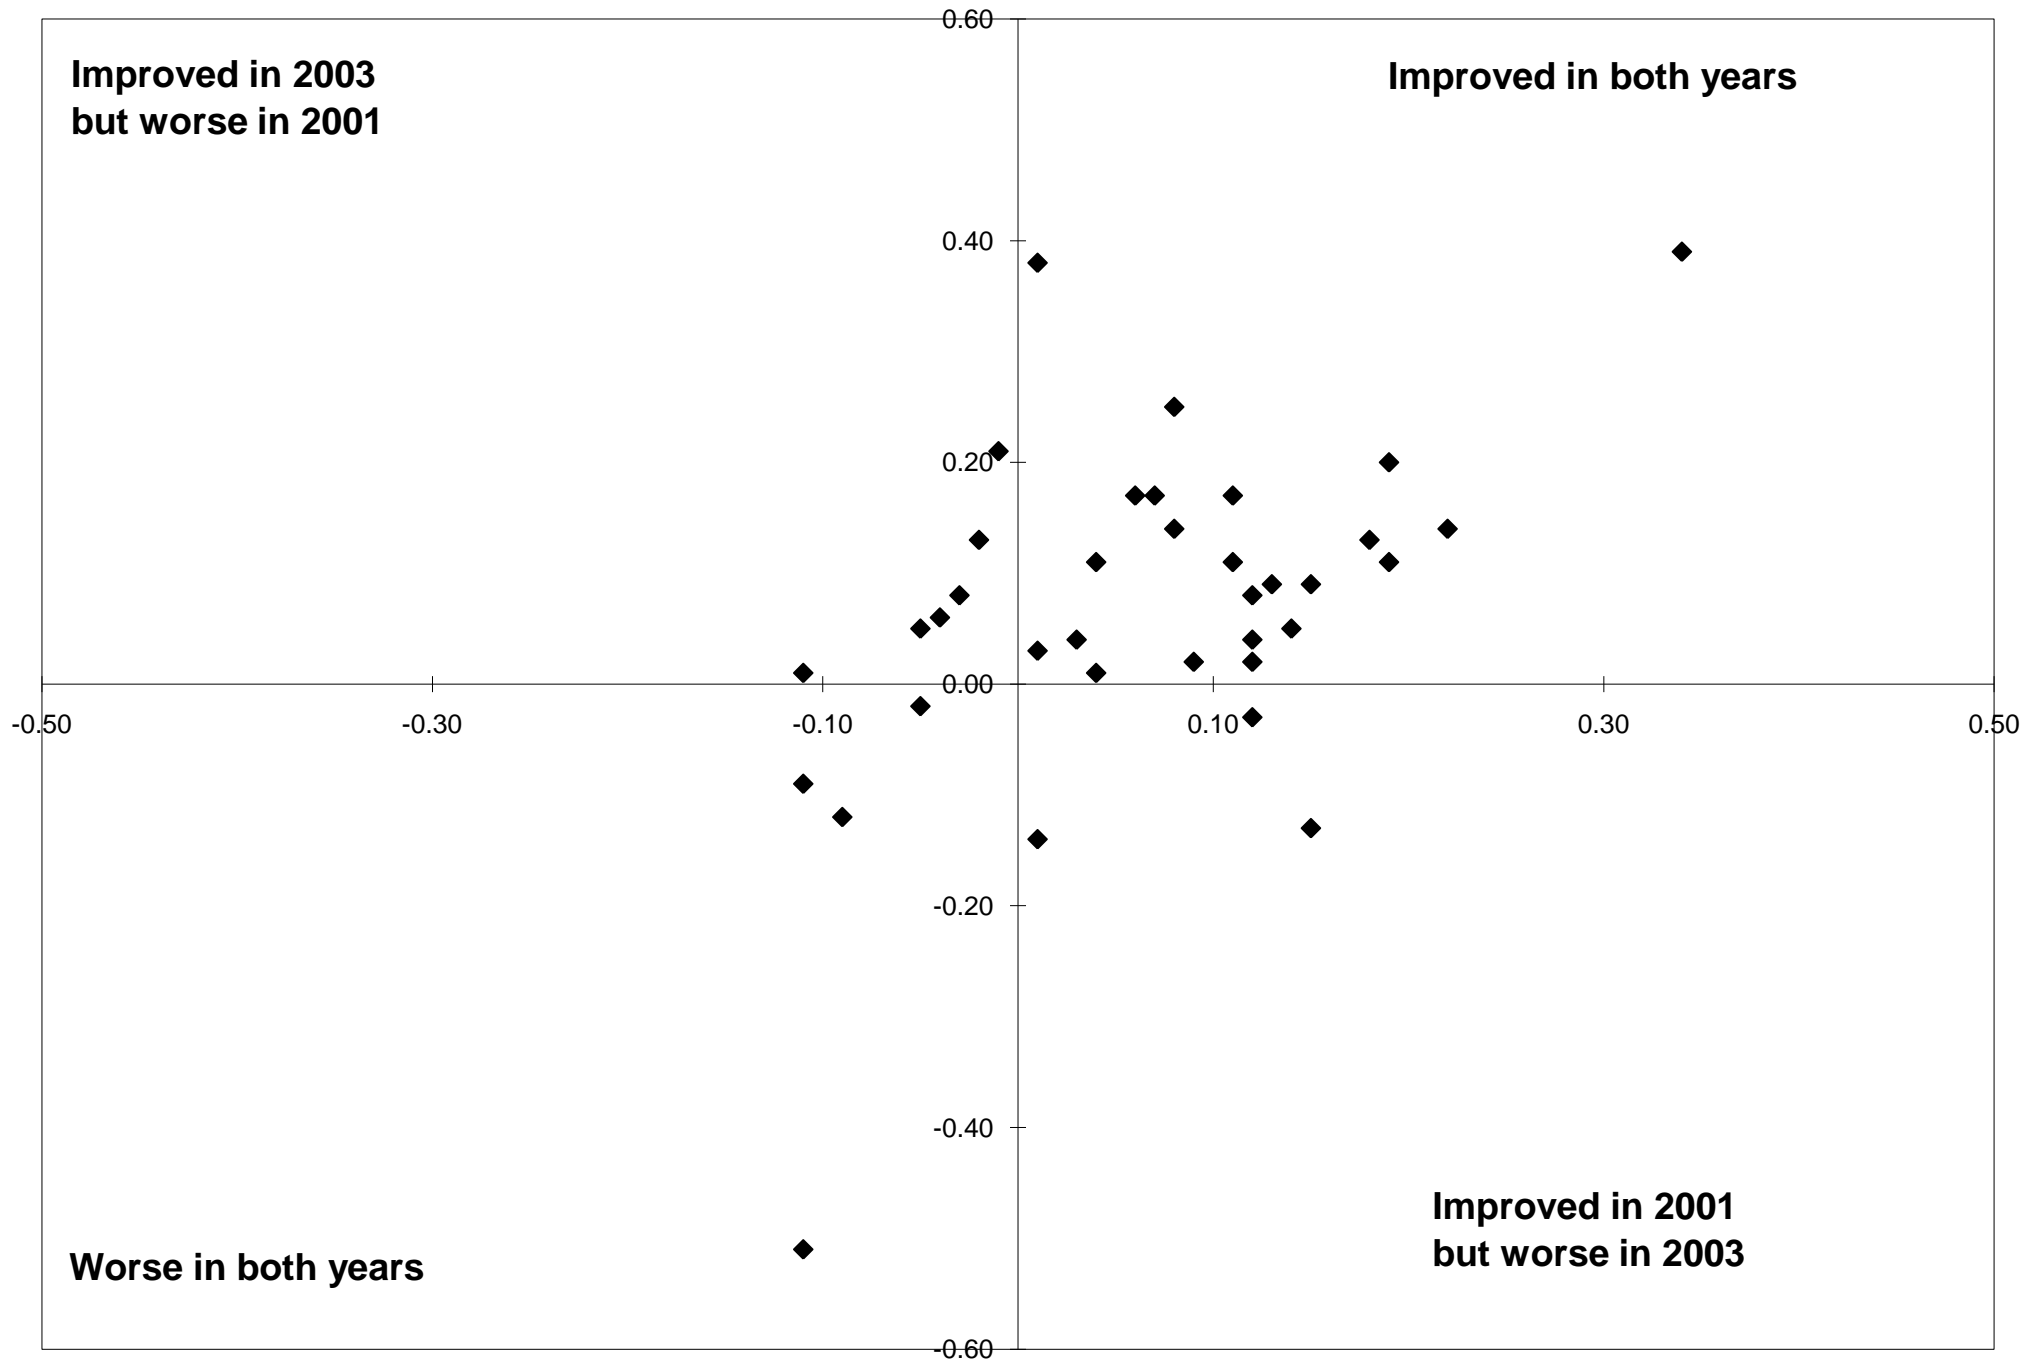

Differences in Kappa values 2001 - 1999

Supplement: MOESM1 [file 9528810]
